# Supplementary material for: Roles of reaction kinetics of CO2 on a PrBaCo2O5.5+δ surfaces
Source: Royal Society of Chemistry journal article supplement (doi:10.1039/c7ra06362h), 2017-01-01
Supplement: c7ra06362h1.pdf [file c7ra06362h1.pdf]

Supporting Material for

**Roles of Reaction Kinetics of CO<sub>2</sub> on a PrBaCo<sub>2</sub>O<sub>5.5+δ</sub> Surfaces**

Xing Xu, Erik Enriquez, Shanyong Bao, Zach Harrell, Brennan Mace, Chonglin Chen\*

Department of Physics & Astronomy, the University of Texas at San Antonio, TX, 78249

Myung-Hwan Whangbo

Department of Chemistry, North Carolina State University, Raleigh, NC 27695-8204,

USA

The splitting of carbon dioxide is a challenging topic. Many efforts have been performed to achieve the reduction and conversion of the CO<sub>2</sub>. One of the direct conversion techniques is the splitting of CO<sub>2</sub> into CO and O<sub>2</sub>. Various materials are explored to achieve this goal. For comparison, some novel results from the previous research are listed in Table S1

Table S1 the current status of the CO<sub>2</sub> splitting techniques and materials

| Technique                     | Material                                                                                                                                                                          | Reactant                          | Temperature(°C) | Ea(eV)              |
|-------------------------------|-----------------------------------------------------------------------------------------------------------------------------------------------------------------------------------|-----------------------------------|-----------------|---------------------|
| Symmetric cell<br>(This work) | PrBCO/YSZ/PBCO                                                                                                                                                                    | CO <sub>2</sub>                   | 700~900         | 1.1, $k_{chem}$     |
| Solid electrolysis<br>cell    | LSCM/YSZ, LSCM/GDC <sup>1</sup>                                                                                                                                                   | CO <sub>2</sub> /CO               | 900             | NA                  |
| Solid electrolysis<br>cell    | (La,Sr)(Cr,Mn)O <sub>3</sub> /GDC <sup>2</sup>                                                                                                                                    | CO <sub>2</sub> /CO               | 900             | NA                  |
| Solid electrolysis<br>cell    | Cu/CGO <sup>3</sup>                                                                                                                                                               | CO <sub>2</sub> /CO=1:1           | 750             | NA                  |
| Solid electrolysis<br>cell    | Ni/YSZ <sup>4</sup>                                                                                                                                                               | CO <sub>2</sub> /CO=1:1 et al     | 850             | NA                  |
| Solid electrolysis<br>cell    | La <sub>0.6</sub> Sr <sub>0.4</sub> Co <sub>0.2</sub> Fe <sub>0.8</sub> O <sub>3-δ</sub> -<br>Gd <sub>0.1</sub> Ce <sub>0.9</sub> O <sub>2-δ</sub><br>(LSCF6428-GDC) <sup>5</sup> | CO <sub>2</sub> /H <sub>2</sub> O | 700-850         | 0.7, $R_{total}$    |
| Solid electrolysis<br>cell    | La <sub>0.2</sub> Sr <sub>0.8</sub> TiO <sub>3</sub> <sup>6</sup>                                                                                                                 | CO <sub>2</sub>                   | 700             | NA                  |
| Thermalchemical               | La <sub>1-x</sub> CaxMnO <sub>3</sub> (LCM) <sup>7</sup>                                                                                                                          | H <sub>2</sub> O, CO <sub>2</sub> | 1300            | NA                  |
| Two step<br>thermalchemical   | Ce <sub>1-x</sub> ZrxO <sub>2</sub> <sup>8</sup>                                                                                                                                  | CO <sub>2</sub>                   | 800–1050        | NA                  |
| Two step<br>thermalchemical   | LaFeO <sub>3</sub> /IrOx <sup>9</sup>                                                                                                                                             | CO <sub>2</sub>                   | 900-1100        | 2.27,<br>Resistance |

Our results indicate that the operation temperature can be as low as around 700~900°C with small activation energy 1.1eV for surface exchange coefficient  $k_{chem}$ . This is much lower than many other materials for the pure CO<sub>2</sub> reduction, such as 2.27eV activation energy for LaFeO<sub>3</sub>/IrOx and with high operation temperature. Although LSCF6428-GDC<sup>5</sup> shows lower 0.7eV activation energy than PBCO, it required the reaction in the CO<sub>2</sub>/H<sub>2</sub>O mixture. For the pure CO<sub>2</sub> reduction, the result of this context is most advanced.

The EIS measurement in  $\text{CO}_2$  has low oxygen partial pressure and the PrBCO electrodes will lose oxygen content in heating process.<sup>10</sup> The oxygen content changes because of the low oxygen partial pressure in the  $\text{CO}_2$  ambient at high temperature. We note that the value of  $x$  in  $\text{PBCo}_2\text{O}_{5.5+x}$  is proportional to the log scale of the oxygen partial pressure,<sup>11</sup> and that at a lower oxygen partial pressure the oxygen content of a perovskite oxide decreases.<sup>12</sup>

In the as-grown PBCO thin film electrode, large number of oxygen vacancies exist and the oxygen stoichiometry deviate from fully oxidized state. When the PBCO electrode is heating up in the carbon dioxide ambient, the oxygen vacancies in the lattice are activated and the stoichiometry is changed due to the oxygen ions and species provided by the splitting of the carbon dioxide on the electrode surface. The oxygen stoichiometry strongly alters the chemical catalysis performance of the PBCO electrode. In the main part of this research, the latter two cycles show same shapes in the surface resistance  $R_s$ , surface capacitance  $C_s$ , interface resistance  $R_i$  and the surface exchange coefficient  $k_{\text{chem}}$ . In Fig. S1, the fitting result of the 1st cycle after the installation of the symmetric cell are demonstrated. The diagram of surface resistance  $R_s$ , the value increases with the temperature monotonically and shows a slope transition near 1073K. Similar transitions exist in surface capacitance  $C_s$ , electrode electrolyte interface resistance  $R_i$  and the surface exchange coefficient. Meanwhile, this kind of transitions doesn't exist in the following cycles which the oxygen vacancies are rebalanced in the carbon dioxide ambient. This transition behavior can be described that the equilibrium between the oxygen partial pressure provided by the splitting of carbon dioxide and that inside the PBCO electrode. In the 1st cycle, PBCO electrode is heat up from room

temperature to 973K and the oxygen provided by carbon dioxide is limited due to the high reaction activation energy. Thus the as-grown fully oxidized PBCO lost oxygen to the ambient till to the equilibrium oxygen stoichiometry. This process only exists in the first cycle and demonstrates unique shape comparing to the results of the other two processes. Then heat up to higher temperature, PBCO electrode can obtain the oxygen in the first cycle as in the other two cycles.

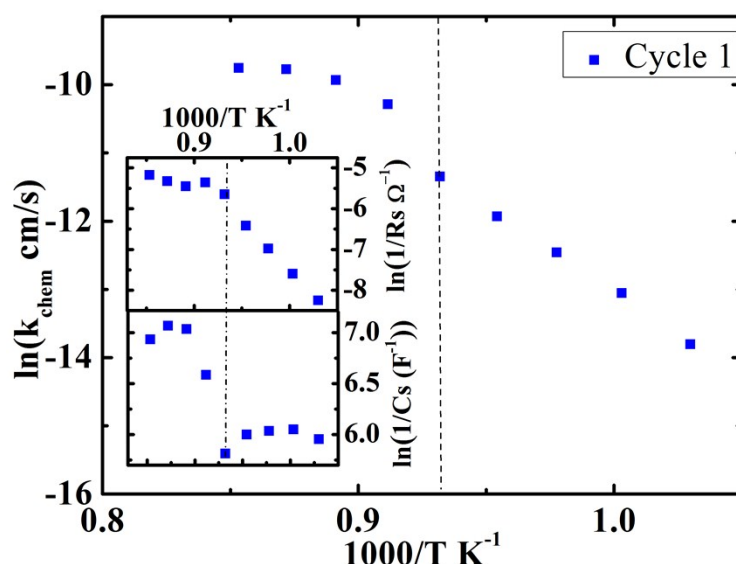

Figure S1. The fitting results of the cycle 1. The dash line is the 800°C and where a transition happens.

## Reference

1. Yue, X.; Irvine, J. T. S., Alternative Cathode Material for CO<sub>2</sub> Reduction by High Temperature Solid Oxide Electrolysis Cells. *Journal of the Electrochemical Society* **2012**, *159* (8), F442-F448.
2. Yue, X.; Irvine, J. T. S., (La,Sr)(Cr,Mn)O-3/GDC cathode for high temperature steam electrolysis and steam-carbon dioxide co-electrolysis. *Solid State Ionics* **2012**, *225*, 131-135.
3. Cheng, C. Y.; Kelsall, G. H.; Kleiminger, L., Reduction of CO<sub>2</sub> to CO at Cu-ceria-gadolinia (CGO) cathode in solid oxide electrolyser. *Journal of Applied Electrochemistry* **2013**, *43* (11), 1131-1144.
4. Graves, C.; Ebbesen, S. D.; Mogensen, M., Co-electrolysis of CO<sub>2</sub> and H<sub>2</sub>O in solid oxide cells: Performance and durability. *Solid State Ionics* **2011**, *192* (1), 398-403.
5. Im, H. N.; Jeon, S. Y.; Lim, D. K.; Singh, B.; Choi, M.; Yoo, Y. S.; Song, S. J., Steam/CO<sub>2</sub> Co-

Electrolysis Performance of Reversible Solid Oxide Cell with  $\text{La}_{0.6}\text{Sr}_{0.4}\text{Co}_{0.2}\text{Fe}_{0.8}\text{O}_{3-\delta}\text{-Gd}_{0.1}\text{Ce}_{0.9}\text{O}_{2-\delta}$  Oxygen Electrode. *Journal of the Electrochemical Society* **2015**, 162 (1), F54-F59.

6. Li, S.; Li, Y.; Gan, Y.; Xie, K.; Meng, G., Electrolysis of  $\text{H}_2\text{O}$  and  $\text{CO}_2$  in an oxygen-ion conducting solid oxide electrolyzer with a  $\text{La}_{0.2}\text{Sr}_{0.8}\text{TiO}_{3+\delta}$  composite cathode. *Journal of Power Sources* **2012**, 218, 244-249.

7. Dey, S.; Naidu, B. S.; Govindaraj, A.; Rao, C. N. R., Noteworthy performance of  $\text{La}_{1-x}\text{Ca}_x\text{MnO}_3$  perovskites in generating  $\text{H}_2$  and  $\text{CO}$  by the thermochemical splitting of  $\text{H}_2\text{O}$  and  $\text{CO}_2$ . *Physical Chemistry Chemical Physics* **2015**, 17 (1), 122-125.

8. Abanades, S.; Le Gal, A.,  $\text{CO}_2$  splitting by thermo-chemical looping based on  $\text{Zr}_x\text{Ce}_{1-x}\text{O}_2$  oxygen carriers for synthetic fuel generation. *Fuel* **2012**, 102, 180-186.

9. Jiang, Q. Q.; Chen, Z. P.; Tong, J. H.; Yang, M.; Jiang, Z. X.; Li, C., Catalytic Function of  $\text{IrO}_x$  in the Two-Step Thermochemical  $\text{CO}_2$ -Splitting Reaction at High Temperatures. *Acs Catalysis* **2016**, 6 (2), 1172-1180.

10. Kim, G.; Wang, S.; Jacobson, A. J.; Reimus, L.; Brodersen, P.; Mims, C. A., Rapid oxygen ion diffusion and surface exchange kinetics in  $\text{PrBaCo}_2\text{O}_{5+x}$  with a perovskite related structure and ordered A cations. *Journal of Materials Chemistry* **2007**, 17 (24), 2500.

11. Cox-Galhotra, R. A.; Huq, A.; Hodges, J. P.; Yu, C. F.; Wang, X. Q.; Gong, W. Q.; Jacobson, A. J.; McIntosh, S., An in-situ neutron diffraction study of the crystal structure of  $\text{PrBaCo}_2\text{O}_{5+\delta}$  at high temperature and controlled oxygen partial pressure. *Solid State Ionics* **2013**, 249, 34-40.

12. Taskin, A. A.; Lavrov, A. N.; Ando, Y., Achieving fast oxygen diffusion in perovskites by cation ordering. *Applied Physics Letters* **2005**, 86 (9).
